# Supplementary material for: Highly sensitive and stable phenyl hydrazine chemical sensors based on CuO flower shapes and hollow spheres
Source: Royal Society of Chemistry journal article supplement (doi:10.1039/c3nj40928g), 2013-01-01
Supplement: c3nj40928g.pdf [file c3nj40928g.pdf]

## Supporting Information

Supporting information ( $\Phi$ ): XRD data for both flower shape and hollow sphere CuO.

| $2\theta$        | $d_{hkl}$ | $h$ | $k$ | $l$ | $I_{obs}/I_0$ | $2\theta$         | $d_{hkl}$ | $h$ | $k$ | $l$ | $I_{obs}/I_0$ |
|------------------|-----------|-----|-----|-----|---------------|-------------------|-----------|-----|-----|-----|---------------|
| Flower shape CuO |           |     |     |     |               | Hollow sphere CuO |           |     |     |     |               |
| 32.506           | 2.7522    | 1   | 1   | 0   | 12.489        | 32.583            | 2.7460    | 1   | 1   | 0   | 4.333         |
| 35.265           | 2.5430    | 0   | 0   | 2   | 23.616        | 35.456            | 2.5297    | 0   | 0   | 2   | 30.455        |
| 35.517           | 2.5255    | -1  | 1   | 1   | 69.573        | 35.625            | 2.5181    | -1  | 1   | 1   | 64.772        |
| 38.651           | 2.3277    | 1   | 1   | 1   | 100           | 38.77             | 2.3208    | 1   | 1   | 1   | 100           |
| 39.027           | 2.3061    | 2   | 0   | 0   | 12.561        | 39.025            | 2.3062    | 2   | 0   | 0   | 17.363        |
| 46.148           | 1.9655    | -1  | 1   | 2   | 3.900         | 46.342            | 1.9577    | -1  | 1   | 2   | 2.104         |
| 48.754           | 1.8663    | -2  | 0   | 2   | 29.911        | 48.869            | 1.8622    | -2  | 0   | 2   | 36.421        |
| 51.182           | 1.7833    | 1   | 1   | 2   | 3.226         | 51.392            | 1.776547  | 1   | 1   | 2   | 2.763         |
| 53.382           | 1.7149    | 0   | 2   | 0   | 11.658        | 53.587            | 1.7088    | 0   | 2   | 0   | 15.761        |
| 56.592           | 1.6250    | 0   | 2   | 1   | 2.294         | 56.823            | 1.6190    | 0   | 2   | 1   | 0.690         |
| 58.171           | 1.5846    | 2   | 0   | 2   | 13.464        | 58.327            | 1.5807    | 2   | 0   | 2   | 21.476        |
| 61.32            | 1.5106    | -1  | 1   | 3   | 17.236        | 61.632            | 1.5037    | -1  | 1   | 3   | 27.755        |

|        |        |    |   |   |        |        |        |    |   |   |        |
|--------|--------|----|---|---|--------|--------|--------|----|---|---|--------|
| 65.608 | 1.4218 | 0  | 2 | 2 | 11.887 | 65.911 | 1.4160 | 0  | 2 | 2 | 20.785 |
| 66.383 | 1.4071 | -3 | 1 | 1 | 12.332 | 66.437 | 1.4061 | -3 | 1 | 1 | 17.614 |
| 67.606 | 1.3846 | 1  | 1 | 3 | 5.678  | 67.939 | 1.3786 | 1  | 1 | 3 | 15.667 |
| 68.079 | 1.3761 | 2  | 2 | 0 | 10.267 | 68.256 | 1.3730 | 2  | 2 | 0 | 8.697  |
| 74.575 | 1.2715 | 0  | 0 | 4 | 1.606  | 75.035 | 1.2649 | 0  | 0 | 4 | 3.987  |
